# Supplementary material for: Angiotensin‐Converting Enzyme Inhibitors, Angiotensin II Receptor Blockers, and Outcomes in Patients Hospitalized for COVID‐19
Source: PubMed Central journal article supplement — J Am Heart Assoc. 2021 Dec 10;10(24):e023535. doi: 10.1161/JAHA.121.023535 (PMC9075226; doi:10.1161/jaha.121.023535), 2021-12-10

# **Supplemental Material**

## **Appendix S1. ISIC Investigators**

**University of Michigan in Ann Arbor, USA:** Salim S. Hayek\*, Penelope Blakely, Christopher Launius, Hanna Berlin, Kingsley Amadi, Tariq U. Azam, Husam Shadid, Michael Pan, Patrick O' Hayer, Chelsea Meloche, Rafey Feroze, Kishan J. Padalia, Elizabeth Anderson, Danny Perry, Abbas Bitar, Rayan Kaakati, Lili Zhao, Peiyao Zhao, Erinleigh Michaud, Yiyuan Huang, Toniemarie Catalan, Ibrahim Khaleel

**Rush University in Chicago, USA:** Jochen Reiser\*, Beata Samelko, Alexander Hlepas, Xuexiang Wang, Priya Patel

**University of Copenhagen at Hvidovre Hospital, Denmark:** Jesper Eugen-Olsen\*, Izzet Altintas, Jens Tingleff, Marius Stauning, Morten Baltzer Houliind, Mette B Lindstrøm, Ove Andersen, Hejdi Gamst-Jensen, Line Jee Hartmann Rasmussen, Christian Rasmussen, Jan O Nehlin, Thomas Kallemose, Imran Parvaiz

**Attikon University Hospital in Athens, Greece:** Evangelos J. Giamarellos-Bourboulis\*, Maria-Evangelia Adami, Nicky Solomonidi, Maria Tsilika, Maria Saridaki, Vasileios Lekakis

**University Hospital Dusseldorf, Germany:** Sven Loosen\*, Tom Luedde, Verena Keitel

**University of Thessaly, Greece:** Athanasios Chalkias\*, Eleni Arnaoutoglou, Ioannis Pantazopoulos, Eleni Laou, Konstantina Kolonia, Anargyros Skoulakis

**Charité University Medicine Berlin, Germany:** Frank Tacke\*, Pinkus Tober-Lau, Raphael Mohr, Florian Kurth, Leif Erik Sander, Christoph Jochum

**University Hospital of Cologne, Germany:** Philipp Koehler

\*Site Principal Investigator

**Table S1. Participating centers and number of patients included in the substudy.**

| <b>Institution</b>                            | <b>Number of patients<br/>included</b> |
|-----------------------------------------------|----------------------------------------|
| University of Michigan in Ann Arbor, MI USA   | 1608                                   |
| Rush University, Chicago, IL USA              | 105                                    |
| University of Copenhagen at Hvidovre, Denmark | 89                                     |
| Attikon University Hospital in Athens, Greece | 90                                     |
| University Hospital of Dusseldorf, Germany    | 27                                     |
| University of Thessaly, Greece                | 29                                     |
| Charite de Berlin, Germany                    | 78                                     |
| University Hospital of Cologne, Germany       | 18                                     |
| <b>Total</b>                                  | <b>2044</b>                            |

**Table S2. In-hospital ACEi/ARB use and risk of death, need for mechanical ventilation, and need for renal replacement therapy in overall cohort (N=2,044).**

|         | Death             |         | Need for Mechanical Ventilation |         | Need for Renal Replacement Therapy |         |
|---------|-------------------|---------|---------------------------------|---------|------------------------------------|---------|
|         | OR (95% CI)       | P-value | OR (95% CI)                     | P-value | OR (95% CI)                        | P-value |
| Model 0 | 0.57 (0.41, 0.81) | 0.002   | 0.75 (0.59, 0.96)               | 0.024   | 0.63 (0.42, 0.96)                  | 0.03    |
| Model 1 | 0.44 (0.30, 0.63) | <0.001  | 0.66 (0.50, 0.87)               | 0.003   | 0.64 (0.48, 0.87)                  | 0.004   |
| Model 2 | 0.45 (0.31, 0.66) | <0.001  | 0.67 (0.51, 0.88)               | 0.005   | 0.54 (0.34, 0.87)                  | 0.012   |

Model 0: Unadjusted

Model 1: age, sex, race, BMI, diabetes mellitus, hypertension, coronary artery disease, congestive heart failure, admission GFR, and institution

Model 2: Model 1 + baseline mean arterial pressure

Overall cohort including patients taking an ACEi/ARB prior to hospitalization but were discontinued during hospitalization and those in whom an ACEi/ARB was initiated during hospitalization.

**Figure S1. Study sample flow chart.**

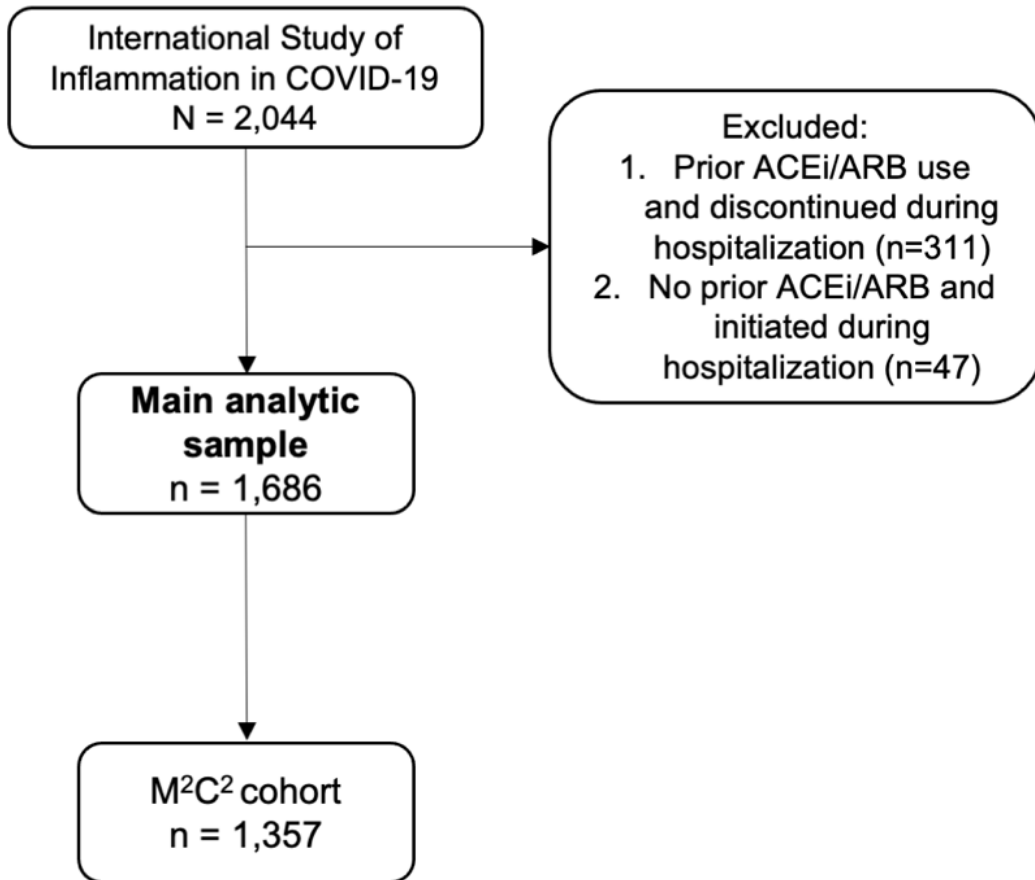

Supplement: JAH3-10-e023535-s001.pdf [file JAH3-10-e023535-s001.pdf]
